# Supplementary material for: Mechanical properties of subisostatic random networks composed of nonlinear fibers
Source: Royal Society of Chemistry journal article supplement (doi:10.1039/d0sm00523a), 2020-01-01
Supplement: d0sm00523a1.pdf [file d0sm00523a1.pdf]

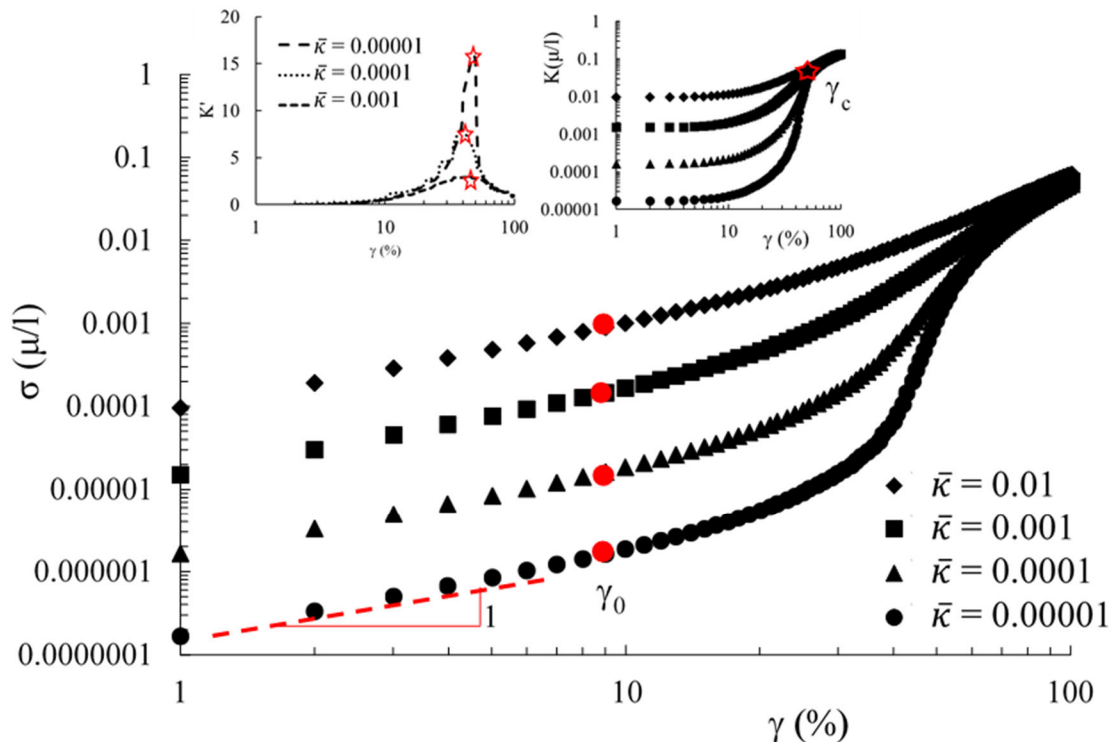

**Figure S1.** The shear stress-strain curves obtained from 2D diluted triangular networks made up of linear elastic fibers. The coordination number  $z$  is about 3.1 in all networks but different value of  $\bar{\kappa}$  are considered. The critical strain  $\gamma_0$ , shown by red circles, denotes the onset of nonlinearity in the overall mechanical response. The top right inset shows the differential shear stiffness  $K$  versus the applied shear strain and the top left inset represents the variation of  $K' = d(\log(K))/d(\log(\gamma))$ ; the maximum point of this plot, denoted by the star symbol, is the inflection point of the  $\log(K)$  versus  $\log(\gamma)$  curve and gives an estimate for critical strain  $\gamma_c$ .

The total bending energy  $H_b$  and total stretching energy  $H_s$  in random fiber networks are,

respectively, given as  $H_b = \sum_{fibers} \frac{\kappa}{2} \int_{fiber} \left| \frac{d\vec{t}}{ds} \right| ds$  and  $H_s = \sum_{fibers} \frac{\mu}{2} \int_{fiber} \left( \frac{dl}{ds} \right)^2 ds$  where  $\frac{dl}{ds}$  is the change

in length and  $\left| \frac{d\vec{t}}{ds} \right|$  is the curvature of a fiber. The relative contributions of bending and stretching

energy in networks composed of linear elastic fibers are shown in Figure S2 where  $H = H_s + H_b$ .

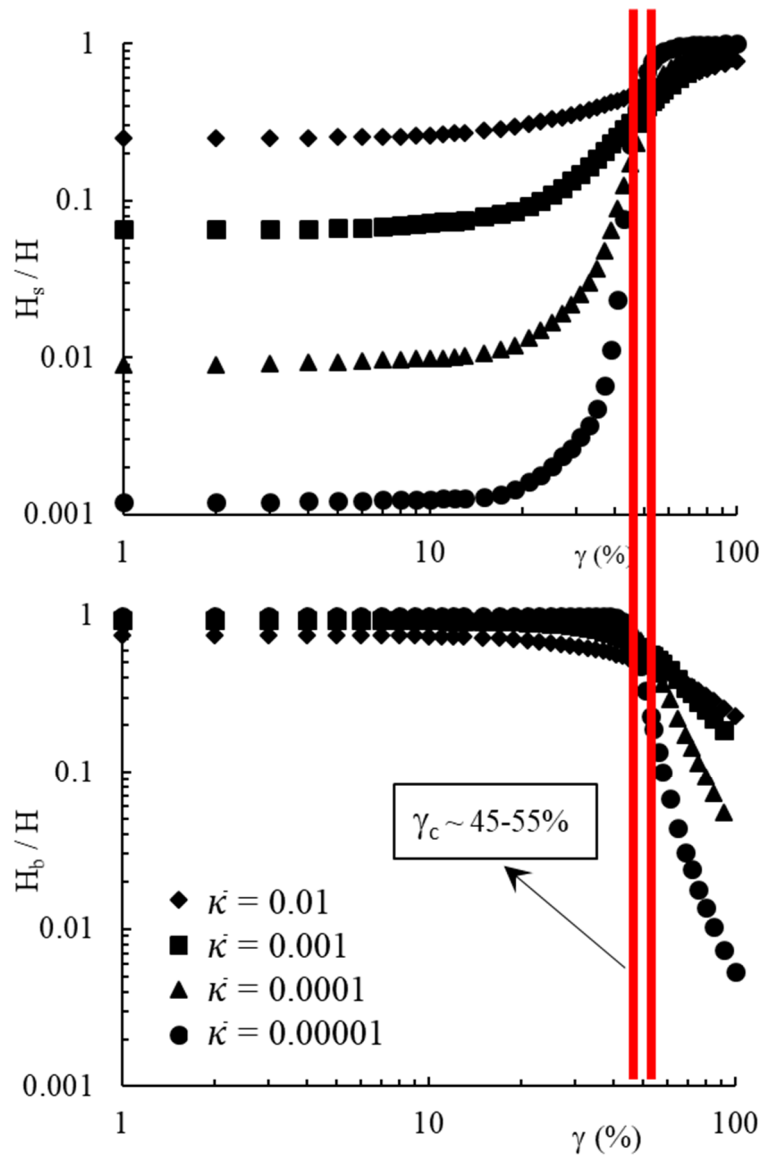

**Figure S2.** The relative contributions of bending and stretching energy in networks composed of linear elastic fibers is plotted as a function of the applied shear strain. The bending energy is dominant for strains less than critical shear strain  $\gamma_c$ . When  $\gamma > \gamma_c$ , the stretching energy becomes important.

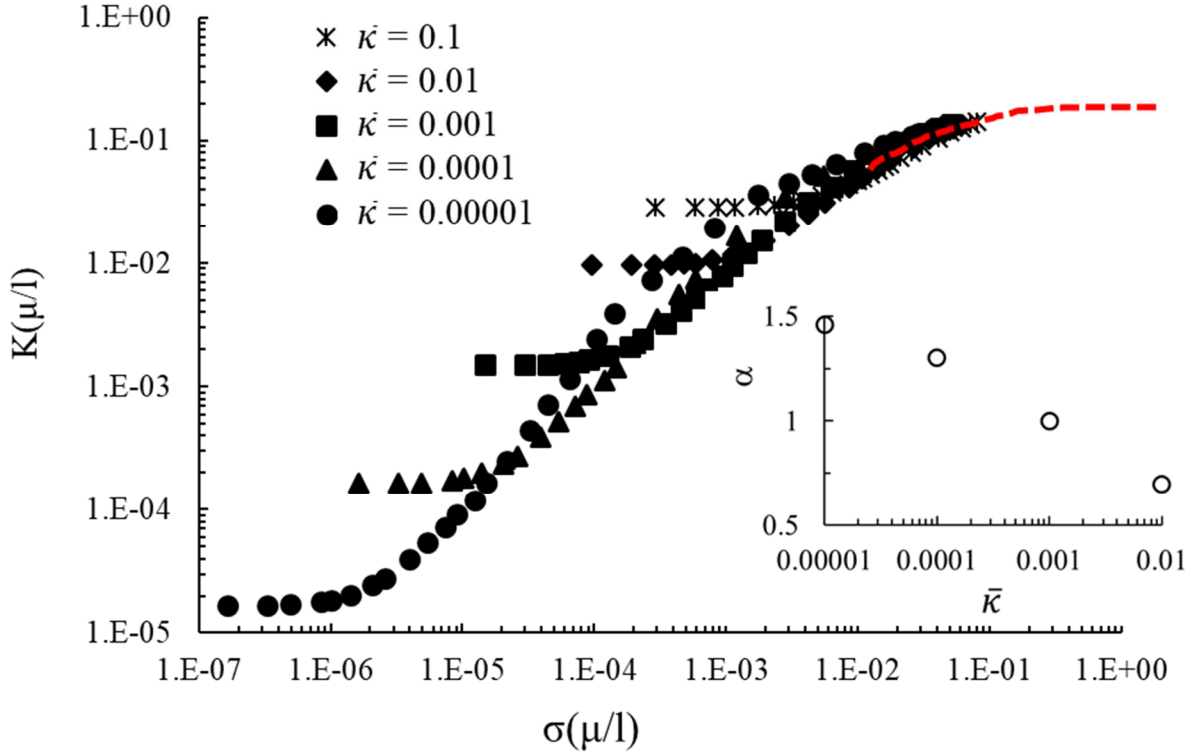

**Figure S3.** The variation of the differential shear modulus of random fiber networks versus the shear stress for linear elastic fibers with different bending rigidity  $\bar{\kappa} = 0.00001 - 0.1$ . The shear modulus and stress are plotted in units of  $\mu/l$ . Three different regions are observed. Initially, the network stiffness is independent of the stress. With increasing the stress, the stiffness increases as  $K \propto \sigma^\alpha$  where  $\alpha$  varies from 0.6 to 1.5 as  $\bar{\kappa}$  decreases from  $10^{-1}$  to  $10^{-5}$  (shown in the inset). With further increase of the stress, the stiffness becomes independent of stress (see the red dashed lines); this is a limitation of linear elastic models and does not agrees with experimental measurements where the network stiffness increases until failure.
